# Supplementary material
Source: publisher site journal article supplement (https://www.dovepress.com/article/292128)
Supplement: Supplementary file 1 [file get_supplementary_file.php]

# ROC Curve

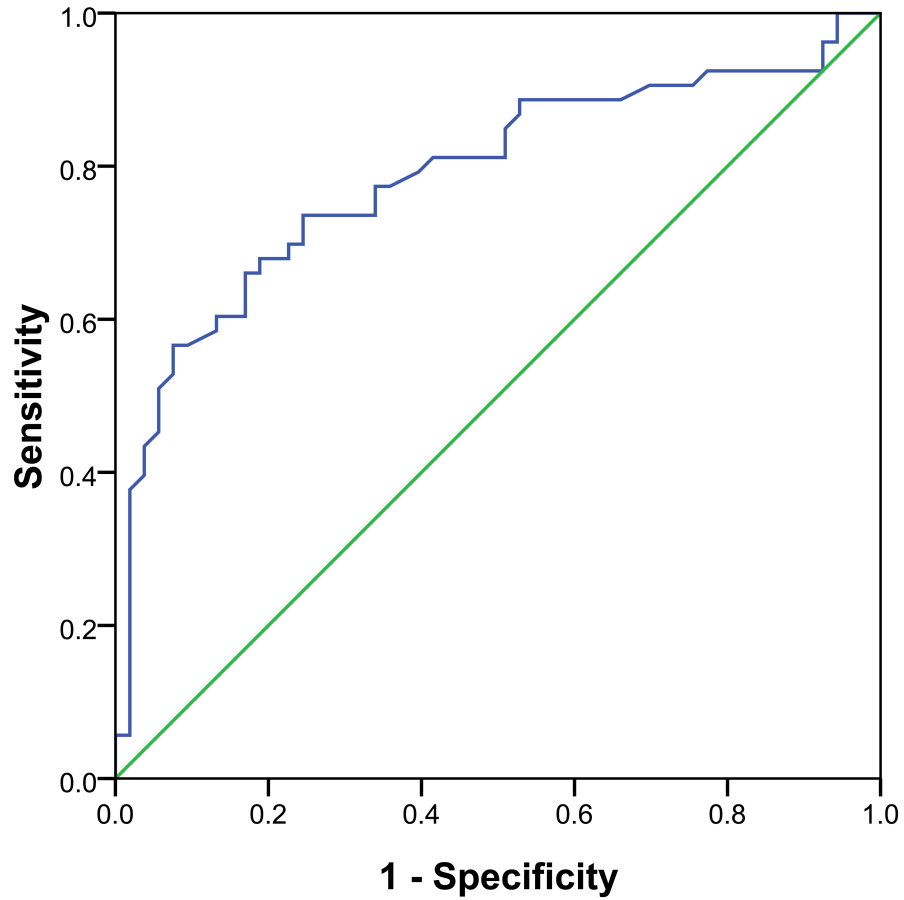

Supplement Figure 1. ROC curve used for determination of cutoff value for serum LAPs.

Survival Functions

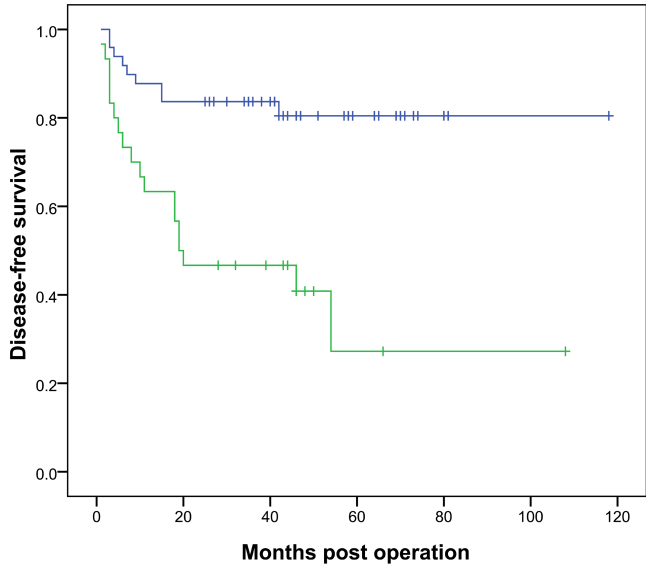

Survival Functions

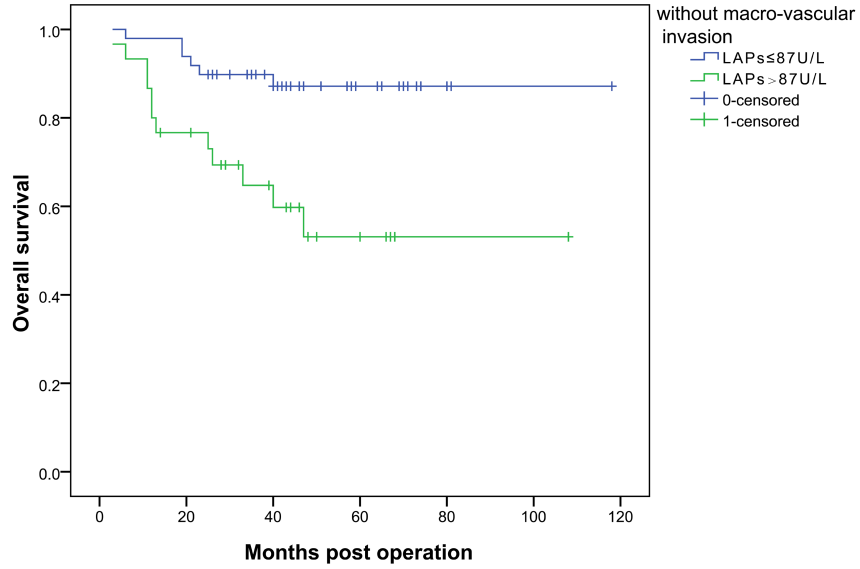

without macro-vascular invasion  
— LAPs ≤ 87 U/L  
— LAPs > 87 U/L  
+ 0-censored  
+ 1-censored

Survival Functions

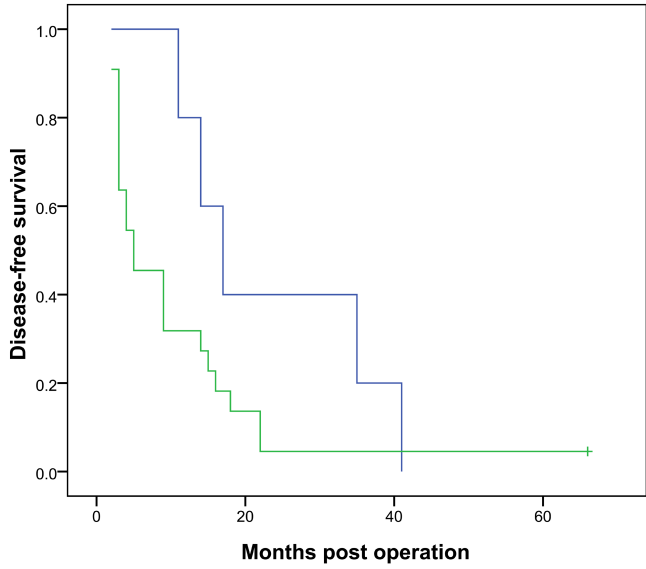

Survival Functions

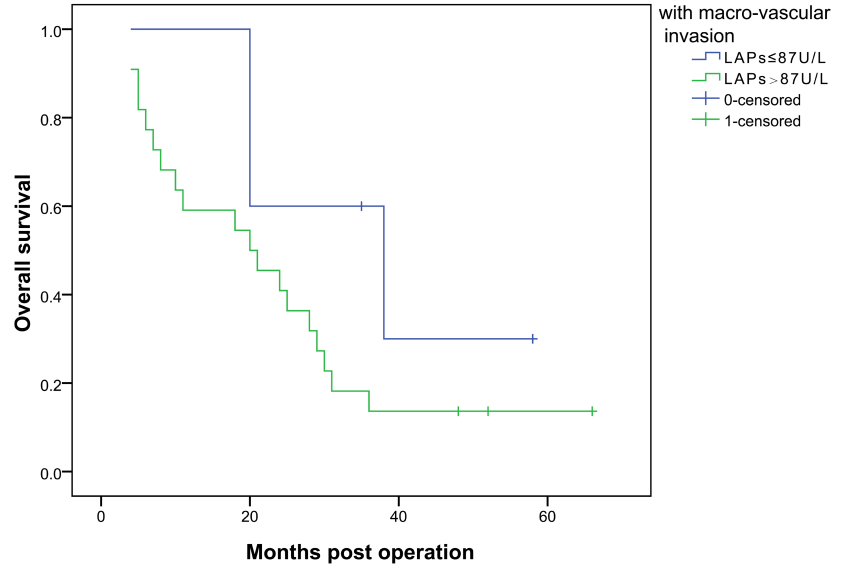

with macro-vascular invasion  
— LAPs ≤ 87 U/L  
— LAPs > 87 U/L  
+ 0-censored  
+ 1-censored

Supplement Figure 2. DFS and OS for HCC patients underwent liver transplantation with and without macro-vascular invasion grouped by serum LAPs level.

**Survival Functions**

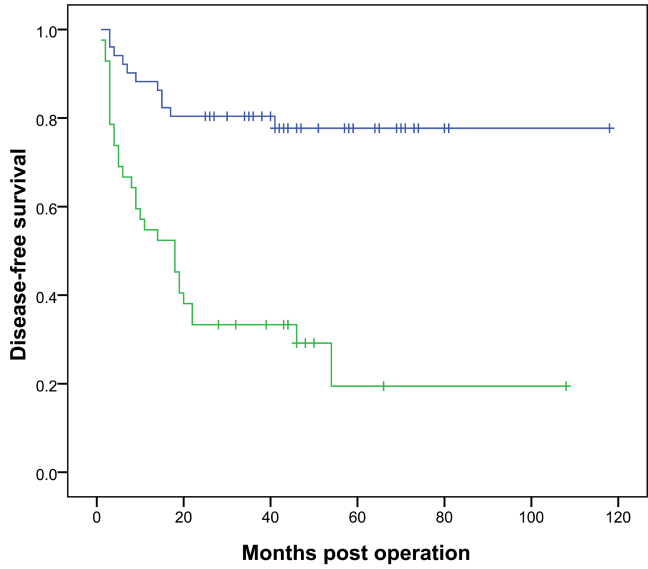

**Survival Functions**

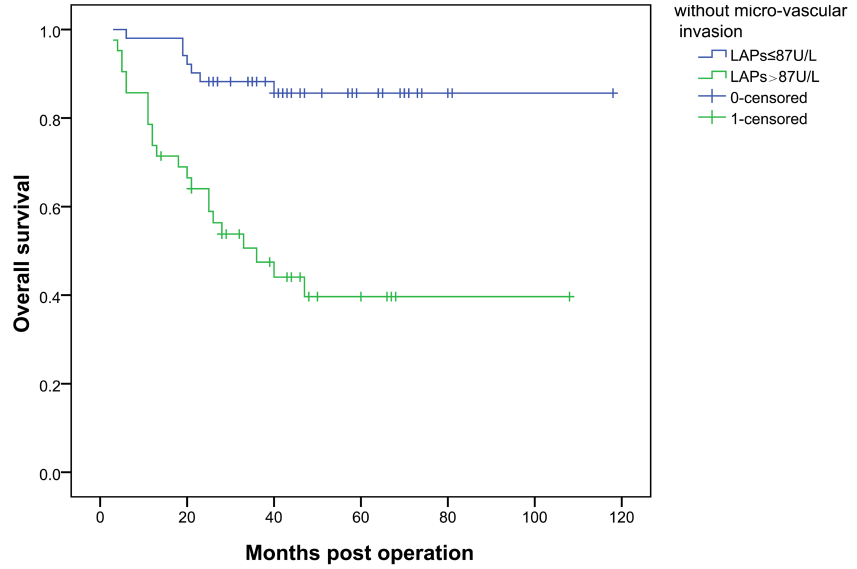

without micro-vascular invasion  
— LAPs  $\leq 87\text{U/L}$   
— LAPs  $> 87\text{U/L}$   
+ 0-censored  
+ 1-censored

**Survival Functions**

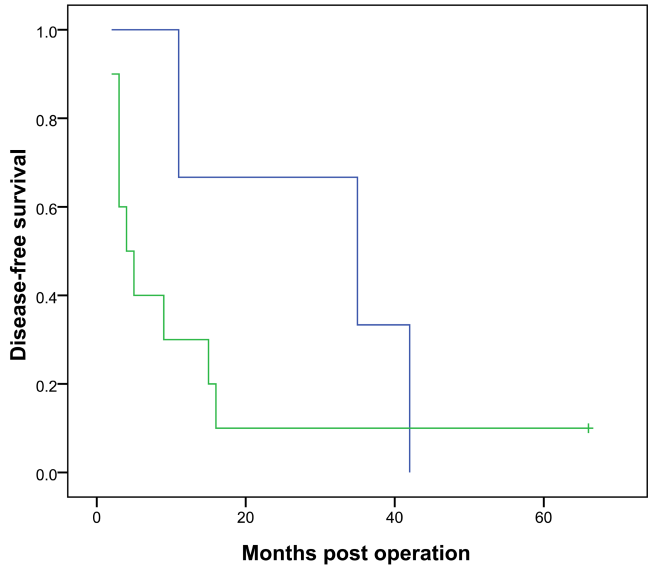

**Survival Functions**

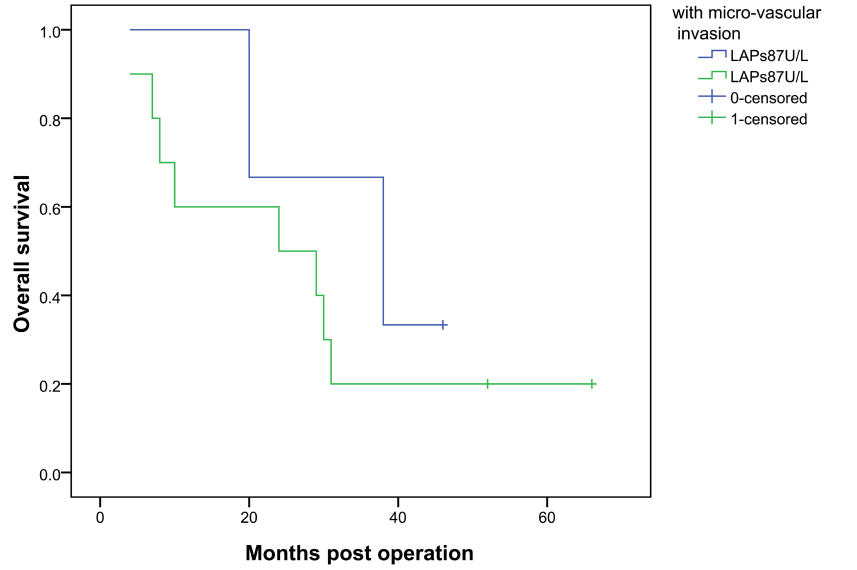

with micro-vascular invasion  
— LAPs  $\leq 87\text{U/L}$   
— LAPs  $> 87\text{U/L}$   
+ 0-censored  
+ 1-censored

Supplement Figure 3. DFS and OS for HCC patients underwent liver transplantation with and without micro-vascular invasion grouped by serum LAPs level.

Supplementary Table 1. Clinicopathological characteristics of HCC patients underwent liver transplantation enrolled in research.

| Category                 | Subcategory | Cases |
|--------------------------|-------------|-------|
| Gender                   | Male        | 100   |
|                          | Female      | 6     |
| HBsAg                    | Positive    | 101   |
|                          | Negative    | 5     |
| Child-Pugh stage         | A           | 67    |
|                          | B           | 29    |
|                          | C           | 10    |
| Preoperative therapy     | Yes         | 49    |
|                          | No          | 57    |
| Edmonson-Steiner grading | I-II        | 67    |
|                          | III-IV      | 39    |
| Milan criteria           | Within      | 37    |
|                          | Beyond      | 69    |
| UCSF criteria            | Within      | 56    |
|                          | Beyond      | 50    |
| Hangzhou criteria        | Within      | 66    |
|                          | Beyond      | 40    |

Supplement Table 2. Detailed information for preoperative therapies of HCC patients underwent liver transplantation.

| Patient code | Preoperative therapy                |
|--------------|-------------------------------------|
| 63           | chemotherapy                        |
| 13           | chemotherapy, radiotherapy          |
| 3            | liver resection                     |
| 11           | liver resection                     |
| 25           | liver resection                     |
| 26           | liver resection                     |
| 32           | liver resection                     |
| 58           | liver resection                     |
| 88           | liver resection                     |
| 91           | liver resection                     |
| 10           | liver resection, chemotherapy       |
| 94           | liver resection, chemotherapy, TACE |
| 102          | liver resection, MWA, TACE          |
| 8            | liver resection, RFA                |
| 15           | liver resection, RFA                |
| 2            | liver resection, RFA, TACE          |
| 5            | liver resection, TACE               |
| 60           | liver resection, TACE               |
| 77           | liver resection, TACE               |
| 18           | RFA                                 |
| 23           | RFA                                 |
| 27           | RFA                                 |
| 29           | RFA                                 |
| 31           | RFA                                 |
| 33           | RFA                                 |
| 34           | RFA                                 |
| 41           | RFA                                 |
| 57           | RFA                                 |
| 65           | RFA                                 |
| 69           | RFA                                 |
| 74           | RFA                                 |
| 6            | TACE                                |
| 28           | TACE                                |
| 36           | TACE                                |
| 44           | TACE                                |
| 46           | TACE                                |
| 47           | TACE                                |
| 56           | TACE                                |
| 59           | TACE                                |
| 64           | TACE                                |



|     |           |
|-----|-----------|
| 70  | TACE      |
| 99  | TACE      |
| 101 | TACE      |
| 103 | TACE      |
| 104 | TACE      |
| 106 | TACE      |
| 35  | TACE, RFA |
| 83  | TACE, RFA |
| 118 | TACE, RFA |

MWA, microwave ablation.

Supplementary Table 3. Prognosis of HCC patients underwent liver transplantation

based on different grouping strategy.

| Variables                   | n  | DFS   |       |       |         | OS    |       |       |         |
|-----------------------------|----|-------|-------|-------|---------|-------|-------|-------|---------|
|                             |    | 1-yr  | 3-yr  | 5-yr  | P       | 1-yr  | 3-yr  | 5-yrs | P       |
| LAPs(U/L)                   |    |       |       |       |         |       |       |       |         |
| ≤ 87                        | 54 | 87.0% | 77.5% | 72.1% |         | 87.1% | 87.0% | 82.3% |         |
| > 87                        | 52 | 50.0% | 28.8% | 19.2% | <0.001  | 72.1% | 41.6% | 35.8% | <0.001  |
| AFP≤ 400 ng/ml              |    |       |       |       |         |       |       |       |         |
| LAPs ≤ 87 U/L               | 44 | 88.6% | 79.2% | 72.5% |         | 100%  | 88.6% | 85.8% |         |
| LAPs > 87 U/L               | 25 | 72.0% | 52.0% | 24.7% | 0.017   | 80.0% | 62.1% | 56.5% | 0.009   |
| AFP>400 ng/ml               |    |       |       |       |         |       |       |       |         |
| LAPs ≤ 87 U/L               | 27 | 80.0% | 70.0% | 70.0% |         | 90.0% | 80.0% | 68.6% |         |
| LAPs > 87 U/L               | 10 | 29.6% | 7.4%  | 3.7%  | < 0.001 | 70.4% | 21.5% | 17.2% | 0.009   |
| The largest tumor size≤5 cm |    |       |       |       |         |       |       |       |         |
| LAPs ≤ 87 U/L               | 41 | 90.2% | 87.8% | 80.7% |         | 97.6% | 95.1% | 95.1% |         |
| LAPs > 87 U/L               | 20 | 80.0% | 50.0% | 50.0% | 0.007   | 95.0% | 64.9% | 56.8% | 0.001   |
| The largest tumor size>5 cm |    |       |       |       |         |       |       |       |         |
| LAPs ≤ 87 U/L               | 13 | 76.9% | 46.2% | 46.2% |         | 97.6% | 95.1% | 95.1% |         |
| LAPs > 87 U/L               | 32 | 31.2% | 15.6% | 7.8%  | 0.008   | 95.0% | 64.9% | 56.8% | 0.095   |
| Tumor number ≤ 3            |    |       |       |       |         |       |       |       |         |
| LAPs ≤ 87 U/L               | 43 | 93.0% | 83.4% | 79.8% |         | 97.7% | 90.7% | 84.8% |         |
| LAPs > 87 U/L               | 31 | 61.3% | 45.2% | 26.3% | < 0.001 | 71.0% | 60.2% | 49.4% | < 0.001 |
| Tumor number > 3            |    |       |       |       |         |       |       |       |         |
| LAPs ≤ 87 U/L               | 11 | 63.6% | 54.5% | 40.9% |         | 100%  | 72.7% | 72.7% |         |
| LAPs > 87 U/L               | 21 | 33.3% | 4.8%  | 4.8%  | 0.010   | 74.4% | 15.4% | 15.4% | 0.006   |

|                                      |    |       |       |       |         |             |       |             |         |
|--------------------------------------|----|-------|-------|-------|---------|-------------|-------|-------------|---------|
| Without macro -<br>vascular invasion |    |       |       |       |         |             |       |             |         |
| LAPs ≤ 87 U/L                        | 49 | 87.8% | 83.7% | 80.5% |         | 98.0%       | 89.8% | 87.2%       |         |
| LAPs > 87 U/L                        | 30 | 63.3% | 46.7% | 27.2% | < 0.001 | 80.0%       | 64.7% | 53.1%       | 0.002   |
| With macro -<br>vascular invasion    |    |       |       |       |         |             |       |             |         |
| LAPs ≤ 87 U/L                        | 5  | 80.0% | 20.0% | 0%    |         | 100%        | 60.0% | 30.0%       |         |
| LAPs > 87 U/L                        | 22 | 31.8% | 4.5%  | 0%    | 0.136   | 59.1%       | 13.6% | 0%          | 0.162   |
| Without micro -<br>vascular invasion |    |       |       |       |         |             |       |             |         |
| LAPs ≤ 87 U/L                        | 51 | 88.2% | 80.4% | 77.7% |         | 98.0%       | 80.4% | 77.7%       |         |
| LAPs > 87 U/L                        | 42 | 54.8% | 33.3% | 29.2% | < 0.001 | 73.8%       | 47.5% | 39.7%       | < 0.001 |
| With micro -<br>vascular invasion    |    |       |       |       |         |             |       |             |         |
| LAPs ≤ 87 U/L                        | 3  | 66.7% | 33.3% | 0%    |         | 100%        | 66.7% | 33.1%       |         |
| LAPs > 87 U/L                        | 10 | 30.0% | 10.0% | 10.0% | 0.292   | 60.0%       | 20.0% | 20.0%       | 0.425   |
| Within Milan<br>criteria             |    |       |       |       | Beyond  | ≤ 87<br>U/L | 24    | > 87<br>U/L | 45      |
| LAPs ≤ 87 U/L                        | 30 | 96.7% | 96.7% | 91.3% |         | 75.0%       | 53.5% | 47.5%       |         |
| LAPs > 87 U/L                        | 7  | 71.4% | 57.1% | 57.1% | 0.007   | 46.7%       | 24.4% | 14.0%       | 0.010   |
| Within UCSF<br>criteria              |    |       |       |       | Beyond  | ≤ 87<br>U/L | 15    | > 87<br>U/L | 35      |
| LAPs ≤ 87 U/L                        | 39 | 94.9% | 86.8% | 82.7% |         | 66.7%       | 53.3% | 44.4%       |         |
| LAPs > 87 U/L                        | 17 | 82.4% | 70.6% | 70.6% | 0.188   | 34.3%       | 8.6%  | 2.9%        | 0.002   |
| Within Hangzhou<br>criteria          |    |       |       |       | Beyond  | ≤ 87<br>U/L | 9     | > 87<br>U/L | 31      |
| LAPs ≤ 87 U/L                        | 45 | 88.9% | 86.7% | 83.2% |         | 77.8%       | 33.3% | 16.7%       |         |
| LAPs > 87 U/L                        | 21 | 76.2% | 61.9% | 41.3% | 0.015   | 32.3%       | 6.5%  | 3.2%        | 0.034   |

For patients within and beyond the selection criteria, only the DFS was calculated.
